# Supplementary material for: Essential role of germ cell glycerol-3-phosphate phosphatase for sperm health, oxidative stress control and male fertility in mice
Source: PubMed Central journal article supplement — Mol Metab. 2024 Nov 13;90:102063. doi: 10.1016/j.molmet.2024.102063 (PMC11617388; doi:10.1016/j.molmet.2024.102063), 2024-11-13
Supplement: mmc1.pdf [file mmc1.pdf]

Supplementary Table 1. Fertility in the inducible conditional G3PP-KO male mice

|                | <b>fl/fl-Cre VEH</b> | <b>fl/fl-Cre TMX (icKO)</b> |
|----------------|----------------------|-----------------------------|
| Number of mice | 4                    | 6                           |
| Litters        | 5.0 ± 0.41           | 4.5 ± 0.62                  |
| Total pups     | 31.0 ± 1.10          | 24.2 ± 4.45                 |
| Pups/ litter   | 6.9 ± 0.57           | 5.4 ± 0.72                  |

Data represent mean ± SEM

Supplementary Table 2. Percentages of sperm abnormalities in the inducible conditional G3PP-KO male mice

| <b>Genotype</b>      | <b>Small head</b> | <b>No head</b> | <b>Bended tail</b>    | <b>No flagellum</b>  | <b>Amorphous shape</b> | <b>Normal sperm</b>       |
|----------------------|-------------------|----------------|-----------------------|----------------------|------------------------|---------------------------|
| fl/fl VEH            | 0                 | 2.6±1.2        | 9.7±1.7               | 0                    | 2.2±1.0                | 85.6±2.9                  |
| fl/fl-Cre VEH        | 0                 | 2.7±1.1        | 21.8±1.3              | 0                    | 2.4±0.9                | 73.7±1.3                  |
| fl/fl TMX            | 2.4±0.9           | 1.7±0.3        | 6.4±1.8               | 0                    | 1.7±0.3                | 87.8±1.7                  |
| fl/fl-Cre TMX (icKO) | 1.5±0.7           | 3.0±1.4        | 70.5±9.5 <sup>#</sup> | 1.5±0.5 <sup>#</sup> | 8.3±3.3                | 17.2±4.9 <sup>&amp;</sup> |

Data represent mean ± SEM and were analyzed by one-way ANOVA with Tukey's test.

“&” -- lower compared to all other genotypes; “#” -- higher compared to all other genotypes.
